# Supplementary material for: Molecular imaging of EGFR and CD44v6 for prediction and response monitoring of HSP90 inhibition in an in vivo squamous cell carcinoma model
Source: PubMed Central journal article supplement (PMC4819754; doi:10.1007/s00259-015-3260-x), 2015-12-01

# Tumor size

weight in g

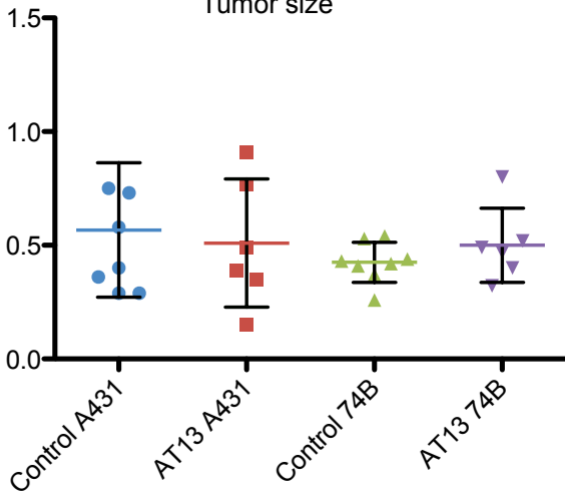

Supplement: 259_2015_3260_MOESM1_ESM.pdf [file 259_2015_3260_MOESM1_ESM.pdf]
